# Supplementary material for: Molecular Biomarker Expression in Window of Opportunity Studies for Oestrogen Receptor Positive Breast Cancer—A Systematic Review of the Literature
Source: MDPI journal article supplement (doi:10.3390/cancers14205027), 2022-10-14
Supplement: s1 [file s1]

## Supplementary File S1

|                                     |
|-------------------------------------|
| 1. Breast Neoplasms/                |
| 2. Carcinoma, Ductal, Breast        |
| 3. Receptors, Estrogen/             |
| 4. hormone.mp.                      |
| 5. ER.mp.                           |
| 6. Biomarkers/                      |
| 7. predict*.mp.                     |
| 8. Pharmacodynamic*.mp.             |
| 9. Window*.mp.                      |
| 10. presurgical.mp.                 |
| 11. pre-surgical.mp.                |
| 12. preoperative.mp.                |
| 13. pre-operative.mp.               |
| 14. short?term.mp.                  |
| 15. 1 OR 2                          |
| 16. 3 OR 4 OR 5                     |
| 17. 6 OR 7 OR 8                     |
| 18. 9 OR 10 OR 11 OR 12 OR 13 OR 14 |
| 19. 15 AND 16 AND 17 AND 18         |

**Supplementary File S1:** Detailed search strategy as used for MEDLINE. Searches on other databases were adjusted in order to fit the specific requirements for each database. Boolean operators “OR” & “AND” were used to combine search terms while asterisks (\*) were used to search for variations from a truncated word stem and question marks (?) were used to search for single character substitutions. N.B. Cochrane utilised (\*) in place of (?)
